# Supplementary material
Source: Springer Nature journal article supplement (https://www.springermedizin.de/resource/supplementary/12881_2009_588_MOESM1_ESM.pdf/9451014)

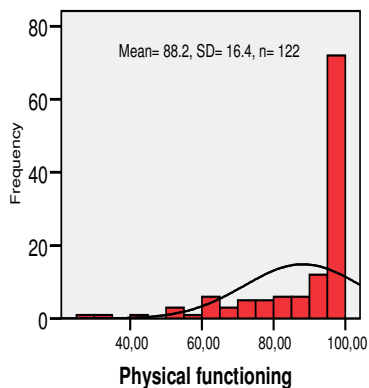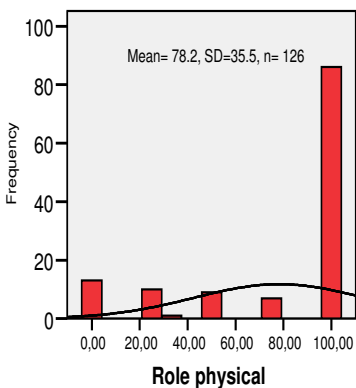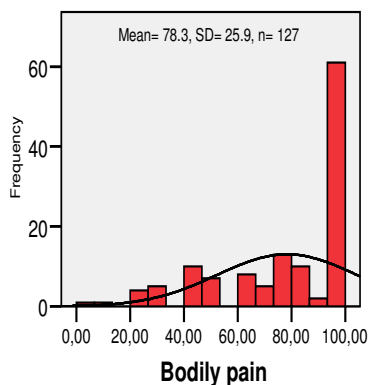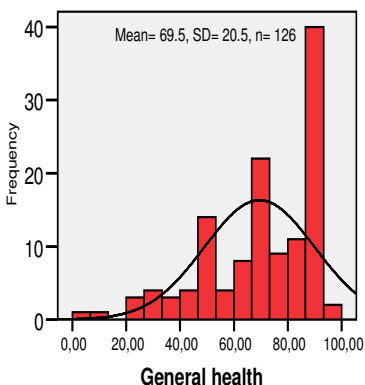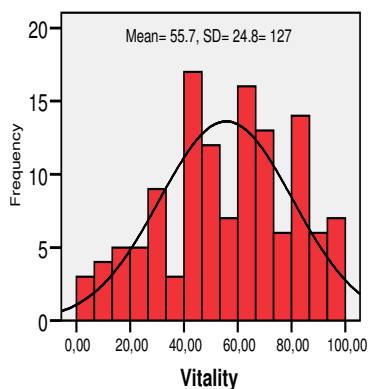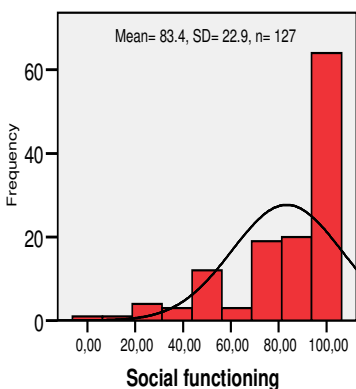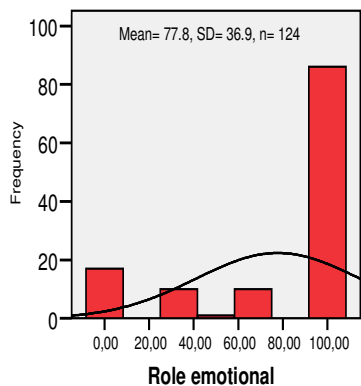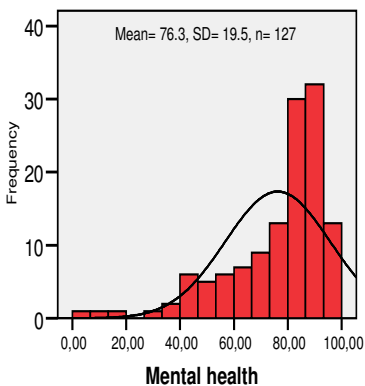

Supplement: MOESM1 [file 9451014]
